# Supplementary material for: Sorting of GLUT4 into its insulin-sensitive store requires the Sec1/Munc18 protein mVps45
Source: PubMed Central journal article supplement — Mol Biol Cell. 2013 Aug 1;24(15):2389–97. doi: 10.1091/mbc.E13-01-0011 (PMC3727931; doi:10.1091/mbc.e13-01-0011), 2013-08-01
Supplement: supp_E13-01-0011v1_CombinedSupMats.pdf [file supp_E13-01-0011v1_CombinedSupMats.pdf]

# Supplemental Materials

*Molecular Biology of the Cell*

Roccisana et al.

Supplemental Table 1.

Effect of mVps45 depletion on levels of other proteins.

|                |                     | Protein Level<br>(% of Control Cells) |                       |
|----------------|---------------------|---------------------------------------|-----------------------|
| <i>Protein</i> | <i>Random shRNA</i> | <i>mVps45 shRNA#1</i>                 | <i>mVps45 shRNA#2</i> |
| mVps45         | 94.6                | 22.1*                                 | 58.6*                 |
| GLUT4          | 98.8                | 23.9*                                 | 41.3*                 |
| TfR            | 96.5                | 103                                   | 98.4                  |
| EEA1           | 93.5                | 96.5                                  | 95.4                  |
| Sx4            | 92                  | 94.3                                  | 102                   |
| Rab5           | 98.2                | 105.6                                 | 103                   |
| Sx12           | 92                  | 89                                    | 94                    |
| Actin          | 102                 | 95.6                                  | 108                   |
| FAS            | 96                  | 98                                    | 103                   |
| C/EBP $\alpha$ | 92                  | 91                                    | 93                    |
| GAPDH          | 101                 | 98                                    | 103                   |
| SNAP23         | 92                  | 103                                   | 101                   |
| Sx6            | 92                  | 82                                    | 96                    |
| Vti1b          | 101                 | 93                                    | 92                    |
| VAMP3          | 100                 | 105                                   | n/d                   |
| VAMP4          | 100                 | 58.7*                                 | n/d                   |

Levels of the proteins indicated above were examined by immunoblotting in cells infected with either random shRNA, mVps45 shRNA#1 or mVps45 shRNA#2 retrovirus as described. In these experiments, the levels of the indicated proteins were expressed as a % of the level in non infected 3T3-L1 adipocytes. Shown are the mean values of (at least) triplicate determinations for each protein. In the case of the analysis of VAMP3 and VAMP4 levels, we compared cells infected with random shRNA (set to 100%) versus cells infected with mVps45 shRNA#1 only. With the exception of GLUT4, mVps45, rabenosyn and VAMP4 (see text/Figure 2 for details and *p* values), no significant changes were observed. n/d = not determined.
